# Supplementary material
Source: publisher site journal article supplement (https://www.dovepress.com/article/352851)
Supplement: Supplementary file 1 [file get_supplementary_file.php]

# Supplementary materials

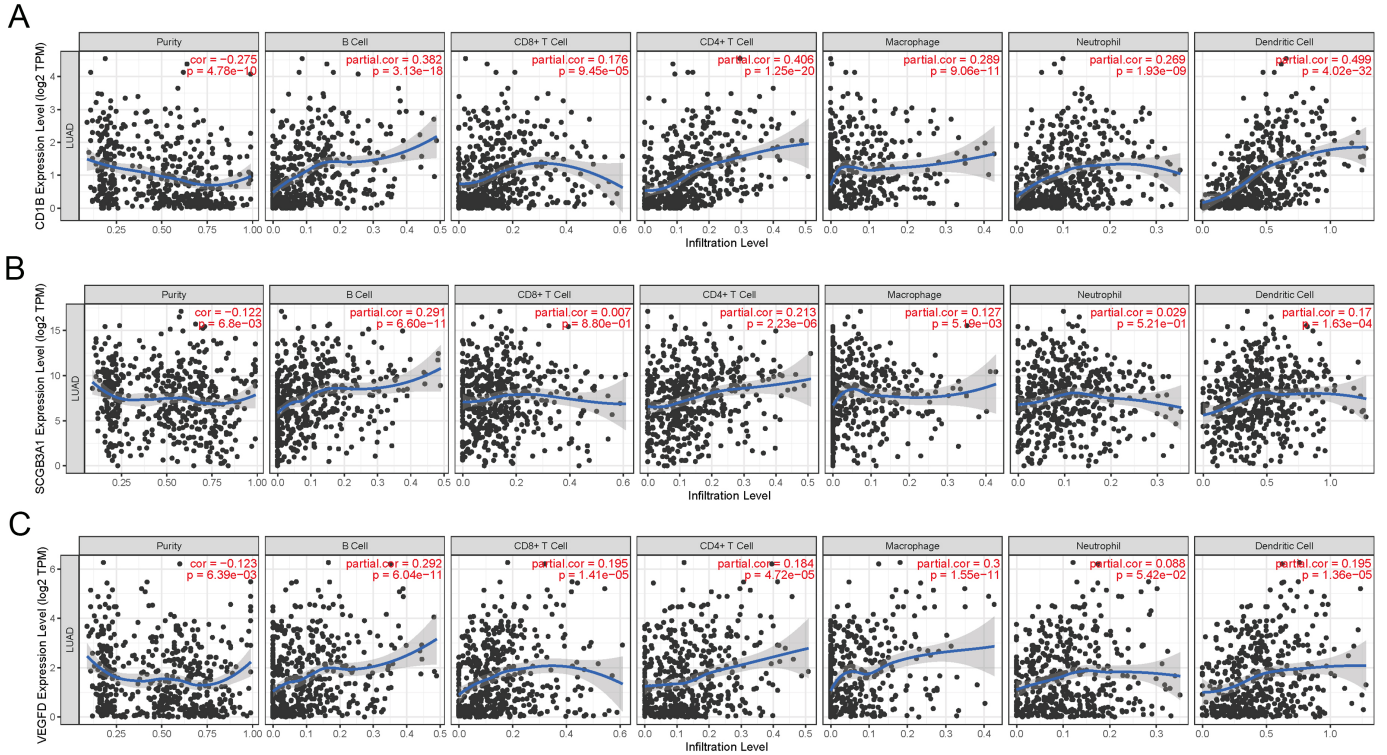

**Figure S1.** Correlation between expression of three hub genes and immune cell infiltration.

Scatter plots of the correlation of immune cells with CD1B(A), SCGB3A1(B) and VEGFD(C) are shown.

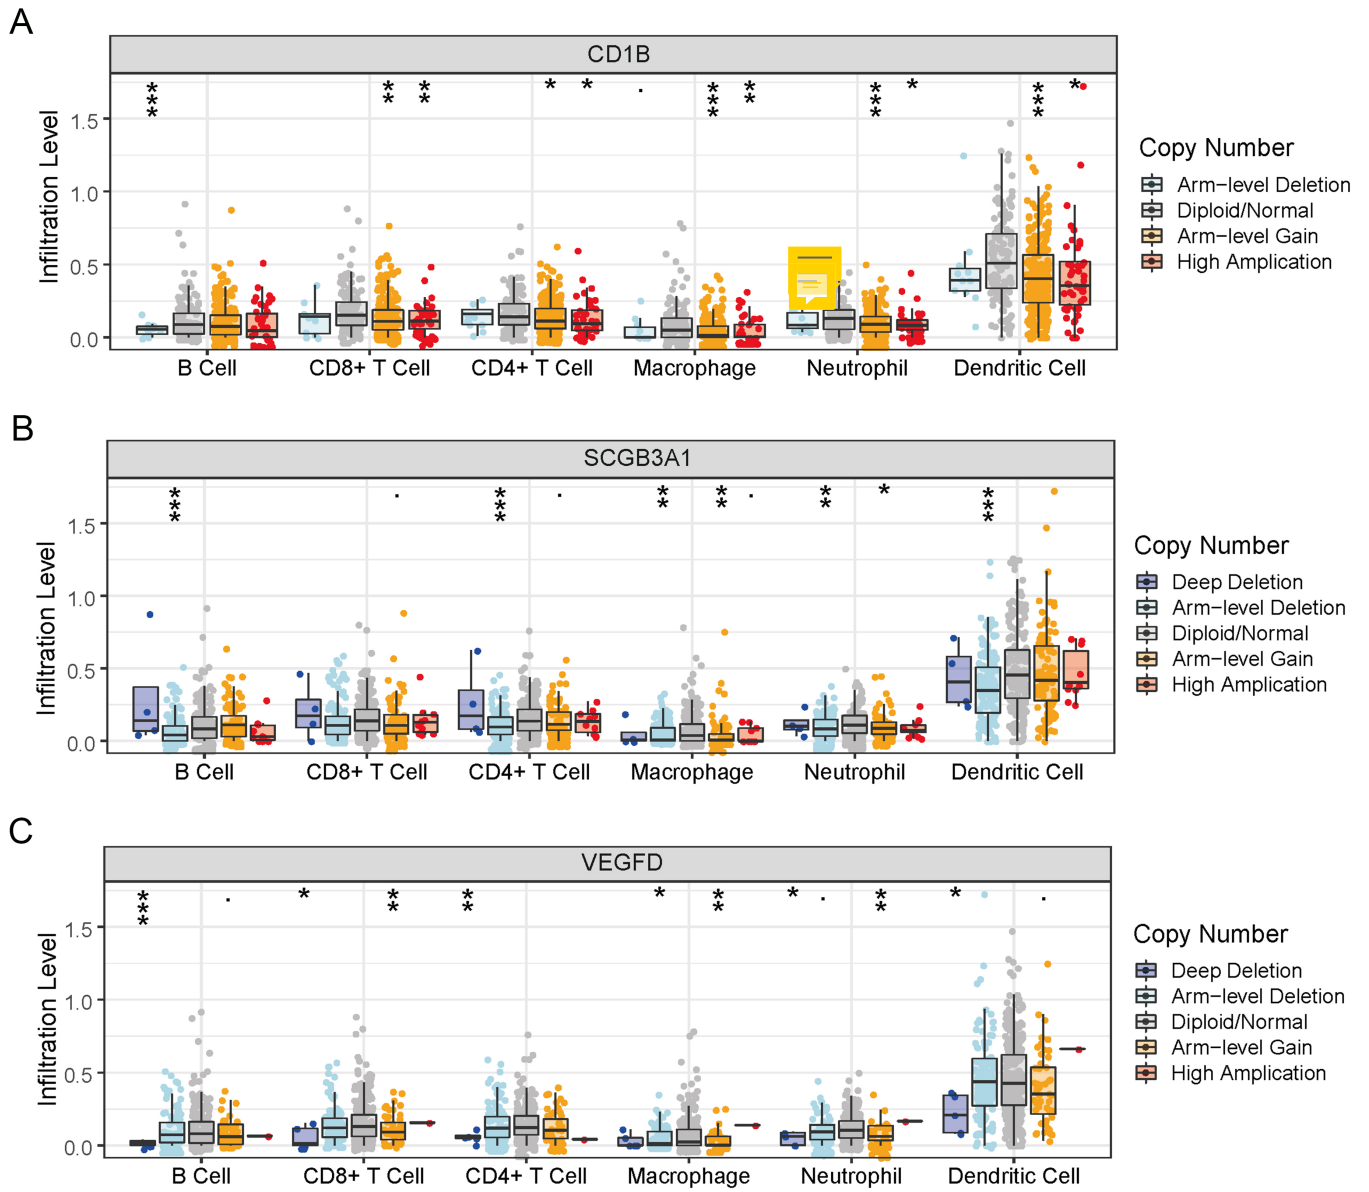

**Figure S2.** Correlation between mutants of hub gene and immune cell infiltration. Boxplots indicated that diverse forms of mutation carried by CD1B(A), SCGB3A1(B) and VEGFD(C) were related to lower immune cell infiltrates. \*\*\* $p < 0.001$ , \*\* $p < 0.01$ , \* $p < 0.05$ .

**Table S1. TMB scores calculated for each LUAD sample in TCGA.**

| <b>Patient ID</b>            | <b>TMB value</b> |
|------------------------------|------------------|
| TCGA-75-7027-01A-11D-1945-08 | 5.894736842      |
| TCGA-91-8496-01A-11D-2393-08 | 0.473684211      |
| TCGA-MP-A4TJ-01A-51D-A25L-08 | 1.394736842      |
| TCGA-64-5778-01A-01D-1625-08 | 12.13157895      |
| TCGA-62-A46O-01A-11D-A24D-08 | 21.78947368      |
| TCGA-55-6972-01A-11D-1945-08 | 6.157894737      |
| TCGA-55-8621-01A-11D-2393-08 | 0.157894737      |
| TCGA-55-8090-01A-11D-2238-08 | 2.315789474      |
| TCGA-99-7458-01A-11D-2036-08 | 10.21052632      |
| TCGA-05-5429-01A-01D-1625-08 | 0.710526316      |
| TCGA-97-7938-01A-11D-2167-08 | 9.184210526      |
| TCGA-55-A57B-01A-12D-A397-08 | 0.842105263      |
| TCGA-55-7994-01A-11D-2184-08 | 37.60526316      |
| TCGA-05-4425-01A-01D-1753-08 | 0.894736842      |
| TCGA-MN-A4N5-01A-11D-A24P-08 | 10.81578947      |
| TCGA-86-7701-01A-11D-2167-08 | 4.526315789      |
| TCGA-93-A4JN-01A-11D-A24P-08 | 1.473684211      |
| TCGA-38-4632-01A-01D-1753-08 | 11.34210526      |
| TCGA-97-7553-01A-21D-2036-08 | 0.631578947      |
| TCGA-50-5935-01A-11D-1753-08 | 0.815789474      |
| TCGA-99-AA5R-01A-11D-A397-08 | 0.105263158      |
| TCGA-38-4629-01A-02D-1265-08 | 6.973684211      |
| TCGA-55-7907-01A-11D-2167-08 | 28.52631579      |
| TCGA-86-8073-01A-11D-2238-08 | 31.05263158      |
| TCGA-73-A9RS-01A-11D-A410-08 | 23.23684211      |
| TCGA-44-7660-01A-11D-2063-08 | 7.868421053      |
| TCGA-69-7765-01A-11D-2167-08 | 12               |
| TCGA-NJ-A4YF-01A-12D-A25L-08 | 14.92105263      |
| TCGA-55-1595-01A-01D-0969-08 | 7.473684211      |
| TCGA-50-5044-01A-21D-1855-08 | 1.578947368      |
| TCGA-86-8671-01A-11D-2393-08 | 0.026315789      |
| TCGA-73-4662-01A-01D-1265-08 | 5.131578947      |
| TCGA-50-5049-01A-01D-1625-08 | 13.57894737      |
| TCGA-MP-A5C7-01A-11D-A25L-08 | 1.684210526      |
| TCGA-55-7576-01A-11D-2063-08 | 7.842105263      |
| TCGA-55-8505-01A-11D-2393-08 | 0.736842105      |
| TCGA-99-8033-01A-11D-2238-08 | 3.842105263      |
| TCGA-17-Z050-01A-01W-0747-08 | 3.710526316      |
| TCGA-91-6831-01A-11D-1855-08 | 6.763157895      |
| TCGA-86-8054-01A-11D-2238-08 | 5.552631579      |

|                              |             |
|------------------------------|-------------|
| TCGA-75-5147-01A-01D-1625-08 | 0.868421053 |
| TCGA-62-A471-01A-12D-A24D-08 | 2.421052632 |
| TCGA-69-A59K-01A-11D-A25L-08 | 11.76315789 |
| TCGA-MP-A4T7-01A-11D-A24P-08 | 2.973684211 |
| TCGA-17-Z041-01A-01W-0746-08 | 2.605263158 |
| TCGA-99-8025-01A-11D-2238-08 | 11.13157895 |
| TCGA-86-8055-01A-11D-2238-08 | 0.578947368 |
| TCGA-55-6978-01A-11D-1945-08 | 0.394736842 |
| TCGA-99-8028-01A-11D-2238-08 | 3.210526316 |
| TCGA-17-Z019-01A-01W-0746-08 | 0.052631579 |
| TCGA-49-AAR0-01A-21D-A397-08 | 2.131578947 |
| TCGA-44-6146-01A-31D-A27T-08 | 0.657894737 |
| TCGA-97-8179-01A-11D-2284-08 | 4.342105263 |
| TCGA-91-6828-01A-11D-1855-08 | 6.210526316 |
| TCGA-93-A4JO-01A-21D-A24P-08 | 0.5         |
| TCGA-86-7711-01A-11D-2063-08 | 4.631578947 |
| TCGA-17-Z003-01A-01W-0746-08 | 5.026315789 |
| TCGA-86-8585-01A-11D-2393-08 | 13.60526316 |
| TCGA-35-4123-01A-01D-1105-08 | 6.5         |
| TCGA-38-4628-01A-01D-1265-08 | 2.605263158 |
| TCGA-86-8076-01A-31D-2238-08 | 0.921052632 |
| TCGA-73-4666-01A-01D-1265-08 | 9.236842105 |
| TCGA-05-4398-01A-01D-1265-08 | 13.78947368 |
| TCGA-55-6979-01A-11D-1945-08 | 2.236842105 |
| TCGA-97-A4M6-01A-11D-A24P-08 | 0.578947368 |
| TCGA-69-7979-01A-11D-2184-08 | 35.31578947 |
| TCGA-17-Z062-01A-01W-0747-08 | 7.315789474 |
| TCGA-49-AARQ-01A-11D-A410-08 | 16.73684211 |
| TCGA-55-7726-01A-11D-2167-08 | 2.394736842 |
| TCGA-J2-8192-01A-11D-2238-08 | 1.394736842 |
| TCGA-62-8399-01A-21D-2323-08 | 12.18421053 |
| TCGA-55-7283-01A-11D-2036-08 | 4.289473684 |
| TCGA-50-6594-01A-11D-1753-08 | 13.73684211 |
| TCGA-44-6779-01A-11D-1855-08 | 2.368421053 |
| TCGA-69-7974-01A-11D-2184-08 | 11.05263158 |
| TCGA-17-Z022-01A-01W-0746-08 | 30.23684211 |
| TCGA-69-8253-01A-11D-2284-08 | 3.315789474 |
| TCGA-55-6981-01A-11D-1945-08 | 1.236842105 |
| TCGA-75-6211-01A-11D-1753-08 | 8.605263158 |
| TCGA-44-2656-01A-41D-A27T-08 | 16.81578947 |
| TCGA-86-8074-01A-11D-2238-08 | 1.578947368 |
| TCGA-99-8032-01A-11D-2238-08 | 8.631578947 |
| TCGA-78-7539-01A-11D-2063-08 | 10.42105263 |

|                              |             |
|------------------------------|-------------|
| TCGA-17-Z044-01A-01W-0746-08 | 2.842105263 |
| TCGA-35-4122-01A-01D-1105-08 | 5.394736842 |
| TCGA-55-8507-01A-11D-2393-08 | 24          |
| TCGA-55-8302-01A-11D-2323-08 | 13.65789474 |
| TCGA-86-7714-01A-12D-2167-08 | 0.105263158 |
| TCGA-67-6215-01A-11D-1753-08 | 2.184210526 |
| TCGA-17-Z005-01A-01W-0746-08 | 2.842105263 |
| TCGA-55-8508-01A-11D-2393-08 | 4.157894737 |
| TCGA-86-A4P7-01A-11D-A24P-08 | 0.842105263 |
| TCGA-55-8620-01A-11D-2393-08 | 12.15789474 |
| TCGA-17-Z047-01A-01W-0747-08 | 0.342105263 |
| TCGA-78-7535-01A-11D-2063-08 | 3.894736842 |
| TCGA-44-5644-01A-21D-2036-08 | 24.42105263 |
| TCGA-05-4424-01A-22D-1855-08 | 14.13157895 |
| TCGA-67-3773-01A-01D-1040-01 | 2.763157895 |
| TCGA-91-7771-01A-11D-2167-08 | 3.236842105 |
| TCGA-05-4396-01A-21D-1855-08 | 6.5         |
| TCGA-L4-A4E5-01A-11D-A24P-08 | 8.184210526 |
| TCGA-97-8552-01A-11D-2393-08 | 0.526315789 |
| TCGA-97-7937-01A-11D-2167-08 | 11.10526316 |
| TCGA-75-6214-01A-41D-1945-08 | 15.76315789 |
| TCGA-05-5428-01A-01D-1625-08 | 9           |
| TCGA-95-8494-01A-11D-2323-08 | 2.052631579 |
| TCGA-62-8397-01A-11D-2323-08 | 0.684210526 |
| TCGA-MP-A4TA-01A-21D-A24P-08 | 7.052631579 |
| TCGA-49-4506-01A-01D-1265-08 | 2.157894737 |
| TCGA-44-6776-01A-11D-1855-08 | 5           |
| TCGA-05-4384-01A-01D-1753-08 | 2.552631579 |
| TCGA-55-A493-01A-11D-A24D-08 | 3.921052632 |
| TCGA-62-A472-01A-11D-A24D-08 | 1.184210526 |
| TCGA-55-6642-01A-11D-1855-08 | 3.026315789 |
| TCGA-67-6217-01A-11D-1753-08 | 3.815789474 |
| TCGA-NJ-A4YP-01A-11D-A25L-08 | 11.52631579 |
| TCGA-62-A470-01A-11D-A24D-08 | 2.842105263 |
| TCGA-78-7153-01A-11D-2036-08 | 1.868421053 |
| TCGA-55-A4DG-01A-11D-A24D-08 | 15.68421053 |
| TCGA-62-A46U-01A-11D-A24D-08 | 0.815789474 |
| TCGA-97-8177-01A-11D-2284-08 | 0.447368421 |
| TCGA-73-4675-01A-01D-1265-08 | 1.421052632 |
| TCGA-44-3396-01A-01D-1553-08 | 2.921052632 |
| TCGA-49-6744-01A-11D-1855-08 | 3.236842105 |
| TCGA-55-8506-01A-11D-2393-08 | 41.34210526 |
| TCGA-35-5375-01A-01D-1625-08 | 10.39473684 |

|                              |             |
|------------------------------|-------------|
| TCGA-50-7109-01A-11D-2036-08 | 5.5         |
| TCGA-50-5932-01A-11D-1753-08 | 1.973684211 |
| TCGA-NJ-A55A-01A-11D-A25L-08 | 0.763157895 |
| TCGA-93-8067-01A-11D-2284-08 | 11.36842105 |
| TCGA-44-3398-01A-01D-1105-08 | 2.315789474 |
| TCGA-97-A4M1-01A-11D-A24P-08 | 0.763157895 |
| TCGA-44-A4SU-01A-11D-A24P-08 | 2.736842105 |
| TCGA-69-7980-01A-11D-2184-08 | 18.42105263 |
| TCGA-55-8085-01A-11D-2238-08 | 6.447368421 |
| TCGA-97-A4M3-01A-11D-A24P-08 | 5           |
| TCGA-17-Z007-01A-01W-0746-08 | 1.578947368 |
| TCGA-67-3772-01A-01W-0928-08 | 1.105263158 |
| TCGA-69-8255-01A-11D-2284-08 | 7.184210526 |
| TCGA-95-7562-01A-11D-2238-08 | 10.78947368 |
| TCGA-97-A4M5-01A-11D-A24P-08 | 2.5         |
| TCGA-MP-A4T9-01A-11D-A24P-08 | 0.236842105 |
| TCGA-86-8669-01A-11D-2393-08 | 2.921052632 |
| TCGA-86-8075-01A-11D-2238-08 | 0.763157895 |
| TCGA-55-7227-01A-11D-2036-08 | 3.973684211 |
| TCGA-44-A47G-01A-21D-A24D-08 | 0.657894737 |
| TCGA-55-6984-01A-11D-1945-08 | 0.447368421 |
| TCGA-95-7947-01A-11D-2184-08 | 13.28947368 |
| TCGA-50-6593-01A-11D-1753-08 | 6.605263158 |
| TCGA-J2-A4AG-01A-11D-A24D-08 | 1.315789474 |
| TCGA-L9-A444-01A-21D-A24D-08 | 11.57894737 |
| TCGA-55-7910-01A-11D-2167-08 | 7.210526316 |
| TCGA-17-Z028-01A-01W-0746-08 | 10.52631579 |
| TCGA-49-AARN-01A-21D-A410-08 | 10.94736842 |
| TCGA-MP-A4T8-01A-11D-A24P-08 | 2.973684211 |
| TCGA-17-Z025-01A-01W-0746-08 | 5.5         |
| TCGA-44-5645-01A-51D-A27T-08 | 0.894736842 |
| TCGA-38-A44F-01A-11D-A24D-08 | 0.078947368 |
| TCGA-62-A46P-01A-11D-A24D-08 | 6.631578947 |
| TCGA-78-7536-01A-11D-2063-08 | 15.26315789 |
| TCGA-38-4626-01A-01D-1553-08 | 1.842105263 |
| TCGA-50-6591-01A-11D-1753-08 | 1.052631579 |
| TCGA-78-7167-01A-11D-2063-08 | 4.368421053 |
| TCGA-44-8120-01A-11D-2238-08 | 14.86842105 |
| TCGA-91-6849-01A-11D-1945-08 | 3.131578947 |
| TCGA-49-4510-01A-01D-1265-08 | 1.105263158 |
| TCGA-55-8096-01A-11D-2238-08 | 2.447368421 |
| TCGA-MP-A4SW-01A-21D-A24P-08 | 0.973684211 |
| TCGA-17-Z017-01A-01W-0746-08 | 5.473684211 |

|                              |             |
|------------------------------|-------------|
| TCGA-80-5608-01A-31D-1945-08 | 3.947368421 |
| TCGA-67-3770-01A-01D-0969-08 | 5.394736842 |
| TCGA-50-6590-01A-12D-1855-08 | 17.65789474 |
| TCGA-55-8203-01A-11D-2238-08 | 10.21052632 |
| TCGA-91-A4BC-01A-11D-A24D-08 | 8.052631579 |
| TCGA-55-6982-01A-11D-1945-08 | 3.552631579 |
| TCGA-95-7043-01A-11D-1945-08 | 27.23684211 |
| TCGA-17-Z058-01A-01W-0747-08 | 6.078947368 |
| TCGA-78-7220-01A-11D-2036-08 | 21.21052632 |
| TCGA-55-5899-01A-11D-1625-08 | 10.5        |
| TCGA-78-7150-01A-21D-2036-08 | 9.394736842 |
| TCGA-55-A492-01A-11D-A24D-08 | 5.736842105 |
| TCGA-49-4488-01A-01D-1753-08 | 7.078947368 |
| TCGA-17-Z030-01A-01W-0746-08 | 10.60526316 |
| TCGA-55-6975-01A-11D-1945-08 | 2           |
| TCGA-50-5045-01A-01D-1625-08 | 5.263157895 |
| TCGA-17-Z001-01A-01W-0746-08 | 5.157894737 |
| TCGA-97-7941-01A-11D-2184-08 | 1.736842105 |
| TCGA-78-7542-01A-21D-2063-08 | 8.710526316 |
| TCGA-55-8206-01A-11D-2238-08 | 0.657894737 |
| TCGA-49-4507-01A-01D-1265-08 | 4.605263158 |
| TCGA-17-Z015-01A-01W-0746-08 | 13.15789474 |
| TCGA-55-8089-01A-11D-2238-08 | 25.86842105 |
| TCGA-86-8359-01A-11D-2323-08 | 3.763157895 |
| TCGA-50-5944-01A-11D-1753-08 | 1.684210526 |
| TCGA-MP-A4SY-01A-21D-A24P-08 | 2.631578947 |
| TCGA-05-4402-01A-01D-1265-08 | 1.342105263 |
| TCGA-55-6970-01A-11D-1945-08 | 4.263157895 |
| TCGA-17-Z033-01A-01W-0746-08 | 2.421052632 |
| TCGA-78-7540-01A-11D-2063-08 | 0.684210526 |
| TCGA-17-Z036-01A-01W-0746-08 | 1.921052632 |
| TCGA-67-3771-01A-01D-1040-01 | 24.44736842 |
| TCGA-55-6968-01A-11D-1945-08 | 10.57894737 |
| TCGA-95-7039-01A-11D-1945-08 | 28.89473684 |
| TCGA-73-4676-01A-01D-1753-08 | 2.210526316 |
| TCGA-64-1681-01A-11D-2063-08 | 1.078947368 |
| TCGA-78-7155-01A-11D-2036-08 | 40.02631579 |
| TCGA-44-A479-01A-31D-A24D-08 | 5.710526316 |
| TCGA-55-A490-01A-11D-A24D-08 | 30.26315789 |
| TCGA-L9-A5IP-01A-21D-A397-08 | 7.131578947 |
| TCGA-44-5643-01A-01D-1625-08 | 3.052631579 |
| TCGA-05-4415-01A-22D-1855-08 | 4.894736842 |
| TCGA-75-6206-01A-11D-1753-08 | 2.078947368 |

|                              |             |
|------------------------------|-------------|
| TCGA-J2-A4AE-01A-21D-A24D-08 | 0.736842105 |
| TCGA-17-Z053-01A-01W-0747-08 | 7.789473684 |
| TCGA-86-6562-01A-11D-1753-08 | 0.921052632 |
| TCGA-55-8514-01A-11D-2393-08 | 6.947368421 |
| TCGA-44-2657-01A-01D-1105-08 | 8.026315789 |
| TCGA-44-7669-01A-21D-2063-08 | 10.65789474 |
| TCGA-05-4422-01A-01D-1265-08 | 0.921052632 |
| TCGA-05-4244-01A-01D-1105-08 | 5.526315789 |
| TCGA-97-8174-01A-11D-2284-08 | 3.315789474 |
| TCGA-95-8039-01A-11D-2238-08 | 2.105263158 |
| TCGA-50-5066-01A-01D-1625-08 | 5.052631579 |
| TCGA-97-7552-01A-11D-2036-08 | 0.368421053 |
| TCGA-95-7944-01A-11D-2184-08 | 5.5         |
| TCGA-44-6148-01A-11D-1753-08 | 0.105263158 |
| TCGA-97-7547-01A-11D-2036-08 | 3.578947368 |
| TCGA-L9-A7SV-01A-11D-A397-08 | 37.44736842 |
| TCGA-67-6216-01A-11D-1753-08 | 0.447368421 |
| TCGA-44-6147-01A-31D-A27T-08 | 1.078947368 |
| TCGA-93-7347-01A-11D-2184-08 | 2.342105263 |
| TCGA-73-7498-01A-12D-2184-08 | 2.789473684 |
| TCGA-86-8668-01A-11D-2393-08 | 0.710526316 |
| TCGA-55-1592-01A-01D-0969-08 | 12.73684211 |
| TCGA-49-4514-01A-21D-1855-08 | 7.184210526 |
| TCGA-17-Z014-01A-01W-0746-08 | 8.947368421 |
| TCGA-NJ-A7XG-01A-12D-A397-08 | 0.578947368 |
| TCGA-69-8254-01A-11D-2284-08 | 1.973684211 |
| TCGA-44-7672-01A-11D-2063-08 | 2.421052632 |
| TCGA-95-7948-01A-11D-2184-08 | 3.447368421 |
| TCGA-17-Z042-01A-01W-0746-08 | 11.07894737 |
| TCGA-O1-A52J-01A-11D-A25L-08 | 3.894736842 |
| TCGA-86-7954-01A-11D-2184-08 | 3.289473684 |
| TCGA-93-7348-01A-21D-2036-08 | 1.763157895 |
| TCGA-49-AAR3-01A-11D-A410-08 | 1.657894737 |
| TCGA-64-1676-01A-01D-0969-08 | 14.52631579 |
| TCGA-69-7761-01A-11D-2167-08 | 0.552631579 |
| TCGA-55-7995-01A-11D-2184-08 | 16.31578947 |
| TCGA-62-8398-01A-11D-2323-08 | 2.026315789 |
| TCGA-49-6743-01A-11D-1855-08 | 15.68421053 |
| TCGA-78-7633-01A-11D-2063-08 | 2.815789474 |
| TCGA-86-8358-01A-11D-2323-08 | 27.42105263 |
| TCGA-05-4389-01A-01D-1265-08 | 4.631578947 |
| TCGA-80-5607-01A-31D-1945-08 | 3.026315789 |
| TCGA-75-7031-01A-11D-1945-08 | 4.973684211 |



|                              |             |
|------------------------------|-------------|
| TCGA-55-8204-01A-11D-2238-08 | 4.631578947 |
| TCGA-55-8097-01A-11D-2238-08 | 2.394736842 |
| TCGA-83-5908-01A-21D-2284-08 | 4.763157895 |
| TCGA-50-5072-01A-21D-1855-08 | 3.789473684 |
| TCGA-49-4505-01A-01D-1931-08 | 4.552631579 |
| TCGA-NJ-A4YQ-01A-11D-A25L-08 | 23.34210526 |
| TCGA-MP-A4TD-01A-32D-A25L-08 | 1.473684211 |
| TCGA-86-A456-01A-11D-A24D-08 | 6.842105263 |
| TCGA-78-8655-01A-11D-2393-08 | 2.763157895 |
| TCGA-97-8175-01A-11D-2284-08 | 0.631578947 |
| TCGA-97-8176-01A-11D-2393-08 | 3.236842105 |
| TCGA-55-A48X-01A-11D-A24D-08 | 7.131578947 |
| TCGA-17-Z054-01A-01W-0747-08 | 0.131578947 |
| TCGA-50-5946-01A-11D-1753-08 | 15.42105263 |
| TCGA-75-6205-01A-11D-1753-08 | 0.552631579 |
| TCGA-05-4249-01A-01D-1105-08 | 8.131578947 |
| TCGA-86-8279-01A-11D-2284-08 | 12.68421053 |
| TCGA-05-4432-01A-01D-1265-08 | 11.55263158 |
| TCGA-55-8207-01A-11D-2238-08 | 7.815789474 |
| TCGA-L9-A8F4-01A-11D-A397-08 | 17.21052632 |
| TCGA-50-6597-01A-11D-1855-08 | 1.210526316 |
| TCGA-55-7725-01A-11D-2167-08 | 3.263157895 |
| TCGA-44-2665-01A-01D-A271-08 | 0.710526316 |
| TCGA-17-Z052-01A-01W-0747-08 | 1.157894737 |
| TCGA-55-7574-01A-11D-2036-08 | 2.684210526 |
| TCGA-78-7149-01A-11D-2036-08 | 2.947368421 |
| TCGA-55-6969-01A-11D-1945-08 | 8.921052632 |
| TCGA-55-8615-01A-11D-2393-08 | 2.736842105 |
| TCGA-62-8395-01A-11D-2323-08 | 1.210526316 |
| TCGA-55-7913-01B-11D-2238-08 | 7.815789474 |
| TCGA-49-6745-01A-11D-1855-08 | 2.421052632 |
| TCGA-55-8208-01A-11D-2238-08 | 2.473684211 |
| TCGA-55-A491-01A-11D-A24D-08 | 8.078947368 |
| TCGA-17-Z048-01A-01W-0746-08 | 0.684210526 |
| TCGA-38-6178-01A-11D-1753-08 | 0.815789474 |
| TCGA-86-8674-01A-21D-2393-08 | 7.342105263 |
| TCGA-49-4487-01A-21D-1855-08 | 5.447368421 |
| TCGA-44-2662-01A-01D-A271-08 | 3.421052632 |
| TCGA-49-AAR2-01A-11D-A397-08 | 9.947368421 |
| TCGA-NJ-A4YG-01A-22D-A25L-08 | 2.578947368 |
| TCGA-17-Z026-01A-01W-0746-08 | 16.71052632 |
| TCGA-75-6207-01A-11D-1753-08 | 1.263157895 |
| TCGA-44-8119-01A-11D-2238-08 | 14.63157895 |

|                              |             |
|------------------------------|-------------|
| TCGA-64-5815-01A-01D-1625-08 | 3.868421053 |
| TCGA-73-4668-01A-01D-1265-08 | 14.68421053 |
| TCGA-95-7567-01A-11D-2063-08 | 19.26315789 |
| TCGA-44-6774-01A-21D-1855-08 | 6.842105263 |
| TCGA-78-8662-01A-11D-2393-08 | 29.10526316 |
| TCGA-91-6840-01A-11D-1945-08 | 2.842105263 |
| TCGA-NJ-A55R-01A-11D-A25L-08 | 5.763157895 |
| TCGA-17-Z061-01A-01W-0747-08 | 4.368421053 |
| TCGA-55-7281-01A-11D-2036-08 | 10.65789474 |
| TCGA-MP-A4T6-01A-32D-A25L-08 | 1.421052632 |
| TCGA-55-7724-01A-11D-2167-08 | 2.5         |
| TCGA-62-8394-01A-11D-2323-08 | 1.842105263 |
| TCGA-73-4670-01A-01D-1265-08 | 9.605263158 |
| TCGA-86-8281-01A-11D-2284-08 | 5.526315789 |
| TCGA-55-8616-01A-11D-2393-08 | 11.13157895 |
| TCGA-05-4410-01A-21D-1855-08 | 22.23684211 |
| TCGA-97-8547-01A-11D-2393-08 | 1.315789474 |
| TCGA-95-A4VK-01A-11D-A25L-08 | 6.157894737 |
| TCGA-55-A48Z-01A-12D-A24P-08 | 0.947368421 |
| TCGA-49-6767-01A-11D-1855-08 | 10.31578947 |
| TCGA-44-2661-01A-01D-1105-08 | 0.657894737 |
| TCGA-17-Z055-01A-01W-0747-08 | 9.394736842 |
| TCGA-78-7163-01A-12D-2063-08 | 0.421052632 |
| TCGA-50-8457-01A-11D-2323-08 | 1.210526316 |
| TCGA-69-7973-01A-11D-2184-08 | 6.552631579 |
| TCGA-64-1679-01A-21D-2063-08 | 11.15789474 |
| TCGA-95-A4VN-01A-11D-A25L-08 | 8.157894737 |
| TCGA-78-7147-01A-11D-2036-08 | 7.763157895 |
| TCGA-75-6203-01A-11D-1753-08 | 0.184210526 |
| TCGA-50-5055-01A-01D-1625-08 | 0.131578947 |
| TCGA-44-3919-01A-02D-1458-08 | 0.789473684 |
| TCGA-55-8511-01A-11D-2393-08 | 11.84210526 |
| TCGA-97-8172-01A-11D-2284-08 | 5.815789474 |
| TCGA-49-4486-01A-01D-1265-08 | 2.736842105 |
| TCGA-17-Z037-01A-01W-0746-08 | 2.894736842 |
| TCGA-44-A47B-01A-11D-A24D-08 | 1.263157895 |
| TCGA-78-7146-01A-11D-2036-08 | 9.210526316 |
| TCGA-44-7671-01A-11D-2063-08 | 5.947368421 |
| TCGA-17-Z049-01A-01W-0746-08 | 15.21052632 |
| TCGA-44-3917-01A-01D-A271-08 | 4.736842105 |
| TCGA-17-Z023-01A-01W-0746-08 | 9.263157895 |
| TCGA-55-6985-01A-11D-1945-08 | 9.710526316 |
| TCGA-49-AAQV-01A-11D-A397-08 | 0.789473684 |

|                              |             |
|------------------------------|-------------|
| TCGA-55-8094-01A-11D-2238-08 | 11.15789474 |
| TCGA-44-6145-01A-11D-1753-08 | 7           |
| TCGA-55-6971-01A-11D-1945-08 | 1.894736842 |
| TCGA-55-7573-01A-11D-2036-08 | 1.157894737 |
| TCGA-L9-A443-01A-12D-A24D-08 | 6.052631579 |
| TCGA-62-A46R-01A-11D-A24D-08 | 3.789473684 |
| TCGA-55-7914-01A-11D-2167-08 | 4.052631579 |
| TCGA-L9-A50W-01A-12D-A397-08 | 0.736842105 |
| TCGA-50-6595-01A-12D-1855-08 | 1.157894737 |
| TCGA-55-6543-01A-11D-1753-08 | 0.447368421 |
| TCGA-05-4390-01A-02D-1753-08 | 13.52631579 |
| TCGA-44-A47A-01A-21D-A24D-08 | 4.236842105 |
| TCGA-17-Z059-01A-01W-0747-08 | 3.868421053 |
| TCGA-05-4418-01A-01D-1265-08 | 6.657894737 |
| TCGA-69-7978-01A-11D-2184-08 | 9.684210526 |
| TCGA-91-8497-01A-11D-2393-08 | 0.947368421 |
| TCGA-44-7662-01A-11D-2063-08 | 12.78947368 |
| TCGA-55-8619-01A-11D-2393-08 | 0.078947368 |
| TCGA-55-A494-01A-11D-A24P-08 | 6.157894737 |
| TCGA-50-5931-01A-11D-1753-08 | 7.289473684 |
| TCGA-55-7727-01A-11D-2167-08 | 4.894736842 |
| TCGA-50-5068-01A-01D-1625-08 | 1.842105263 |
| TCGA-53-7626-01A-12D-2063-08 | 8.973684211 |
| TCGA-91-8499-01A-11D-2393-08 | 8.315789474 |
| TCGA-05-5420-01A-01D-1625-08 | 1.421052632 |
| TCGA-78-7161-01A-11D-2036-08 | 4.052631579 |
| TCGA-50-5939-01A-11D-1625-08 | 1.789473684 |
| TCGA-17-Z021-01A-01W-0746-08 | 2.078947368 |
| TCGA-97-A4LX-01A-11D-A24P-08 | 2.078947368 |
| TCGA-55-7815-01A-11D-2167-08 | 2.868421053 |
| TCGA-50-6673-01A-11D-1945-08 | 1.263157895 |
| TCGA-44-7661-01A-11D-2063-08 | 5           |
| TCGA-75-5126-01A-01D-1753-08 | 11.26315789 |
| TCGA-55-8512-01A-11D-2393-08 | 0.947368421 |
| TCGA-44-4112-01A-31D-A27T-08 | 10.42105263 |
| TCGA-50-5936-01A-11D-1625-08 | 2.473684211 |
| TCGA-49-6742-01A-11D-1855-08 | 5.710526316 |
| TCGA-17-Z051-01A-01W-0747-08 | 6.5         |
| TCGA-55-8091-01A-11D-2238-08 | 0.5         |
| TCGA-75-6212-01A-11D-1753-08 | 0.421052632 |
| TCGA-73-4659-01A-01D-1265-08 | 5.289473684 |
| TCGA-44-6775-01A-31D-A27T-08 | 1.105263158 |
| TCGA-44-6144-01A-11D-1753-08 | 4.684210526 |

|                              |             |
|------------------------------|-------------|
| TCGA-55-7284-01B-11D-2238-08 | 0.868421053 |
| TCGA-05-4417-01A-22D-1855-08 | 7.105263158 |
| TCGA-17-Z000-01A-01W-0746-08 | 2.815789474 |
| TCGA-05-5715-01A-01D-1625-08 | 2.894736842 |
| TCGA-78-7145-01A-11D-2036-08 | 4.815789474 |
| TCGA-55-8510-01A-11D-2393-08 | 6.5         |
| TCGA-55-8205-01A-11D-2238-08 | 9.552631579 |
| TCGA-44-8117-01A-11D-2238-08 | 18.76315789 |
| TCGA-78-7166-01A-12D-2063-08 | 5.210526316 |
| TCGA-05-4395-01A-01D-1265-08 | 6.684210526 |
| TCGA-69-7760-01A-11D-2167-08 | 1.5         |
| TCGA-4B-A93V-01A-11D-A397-08 | 3.526315789 |
| TCGA-50-5942-01A-21D-1753-08 | 0.763157895 |
| TCGA-55-1594-01A-01D-1040-01 | 4.684210526 |
| TCGA-53-7813-01A-11D-2167-08 | 3.657894737 |
| TCGA-44-2668-01A-01D-A271-08 | 6.631578947 |
| TCGA-86-8672-01A-21D-2393-08 | 6.526315789 |
| TCGA-73-7499-01A-11D-2184-08 | 1.315789474 |
| TCGA-50-5941-01A-11D-1753-08 | 6.421052632 |
| TCGA-NJ-A4YI-01A-11D-A25L-08 | 11.13157895 |
| TCGA-78-8660-01A-11D-2393-08 | 4.973684211 |
| TCGA-91-6830-01A-11D-1945-08 | 3.552631579 |
| TCGA-MP-A4SV-01A-11D-A24P-08 | 5.184210526 |
| TCGA-64-5781-01A-01D-1625-08 | 24.81578947 |
| TCGA-73-4658-01A-01D-1753-08 | 4.157894737 |
| TCGA-75-7025-01A-12D-1945-08 | 0.526315789 |
| TCGA-55-6987-01A-11D-1945-08 | 3.210526316 |
| TCGA-49-AAR4-01A-12D-A410-08 | 7.315789474 |
| TCGA-73-4677-01A-01D-1265-08 | 6.394736842 |
| TCGA-MP-A4TI-01A-21D-A24P-08 | 3.026315789 |
| TCGA-38-4627-01A-01D-1553-08 | 0.473684211 |
| TCGA-55-1596-01A-01D-1040-01 | 4.763157895 |
| TCGA-05-4427-01A-21D-1855-08 | 23.71052632 |
| TCGA-53-A4EZ-01A-12D-A24P-08 | 13.10526316 |
| TCGA-17-Z045-01A-01W-0746-08 | 16.02631579 |
| TCGA-05-4405-01A-21D-1855-08 | 7.289473684 |
| TCGA-91-6836-01A-21D-1855-08 | 12.21052632 |
| TCGA-49-AAR9-01A-21D-A410-08 | 16.26315789 |
| TCGA-78-7159-01A-11D-2036-08 | 7.289473684 |
| TCGA-78-8648-01A-11D-2393-08 | 0.026315789 |
| TCGA-44-A47F-01A-11D-A24D-08 | 1.473684211 |
| TCGA-50-5933-01A-11D-1753-08 | 10.47368421 |
| TCGA-97-8171-01A-11D-2284-08 | 1.263157895 |

|                              |             |
|------------------------------|-------------|
| TCGA-L9-A743-01A-43D-A397-08 | 1.342105263 |
| TCGA-38-4631-01A-01D-1753-08 | 17.55263158 |
| TCGA-05-4434-01A-01D-1265-08 | 0.684210526 |
| TCGA-05-4420-01A-01D-1265-08 | 6.921052632 |
| TCGA-44-2666-01A-41D-A27T-08 | 0.578947368 |
| TCGA-38-4630-01A-01D-1265-08 | 3.105263158 |
| TCGA-05-4382-01A-01D-1931-08 | 31.36842105 |
| TCGA-05-5423-01A-01D-1625-08 | 3.710526316 |
| TCGA-62-A46S-01A-11D-A24D-08 | 2.657894737 |
| TCGA-75-5125-01A-01D-1753-08 | 3.368421053 |
| TCGA-64-5775-01A-01D-1625-08 | 12.36842105 |
| TCGA-97-7554-01A-11D-2036-08 | 9.894736842 |
| TCGA-MP-A4T4-01A-11D-A25L-08 | 6.842105263 |
| TCGA-55-A48Y-01A-11D-A24D-08 | 6.763157895 |
| TCGA-78-7152-01A-11D-2036-08 | 3.815789474 |
| TCGA-78-7154-01A-11D-2036-08 | 5.789473684 |
| TCGA-95-A4VP-01A-21D-A25L-08 | 2.657894737 |
| TCGA-49-6761-01A-31D-1945-08 | 3.842105263 |
| TCGA-71-6725-01A-11D-1855-08 | 1.131578947 |
| TCGA-05-4433-01A-22D-1855-08 | 0.894736842 |
| TCGA-17-Z018-01A-01W-0746-08 | 6.026315789 |
| TCGA-MP-A4TF-01A-11D-A25L-08 | 9.552631579 |
| TCGA-64-5774-01A-01D-1625-08 | 3.315789474 |
| TCGA-NJ-A55O-01A-11D-A25L-08 | 1.894736842 |
| TCGA-86-6851-01A-11D-1945-08 | 20.55263158 |
| TCGA-78-7156-01A-11D-2036-08 | 7           |
| TCGA-62-A46V-01A-11D-A24D-08 | 1.131578947 |
| TCGA-17-Z057-01A-01W-0747-08 | 8.5         |
| TCGA-44-A4SS-01A-11D-A24P-08 | 8.078947368 |
| TCGA-49-4494-01A-01D-1265-08 | 4.210526316 |
| TCGA-86-8056-01A-11D-2238-08 | 5.684210526 |
| TCGA-67-3774-01A-01D-1040-01 | 2.605263158 |
| TCGA-MN-A4N4-01A-12D-A24P-08 | 29.5        |
| TCGA-17-Z016-01A-01W-0746-08 | 8.210526316 |
| TCGA-93-A4JP-01A-11D-A24P-08 | 0.421052632 |
| TCGA-64-1680-01A-02D-0969-08 | 0.947368421 |
| TCGA-50-6592-01A-11D-1753-08 | 5.763157895 |
| TCGA-17-Z027-01A-01W-0746-08 | 2.210526316 |
| TCGA-78-8640-01A-11D-2393-08 | 16.39473684 |
| TCGA-S2-AA1A-01A-12D-A397-08 | 2.447368421 |
| TCGA-78-7162-01A-21D-2063-08 | 1.157894737 |
| TCGA-69-7764-01A-11D-2167-08 | 1.921052632 |
| TCGA-55-7728-01A-11D-2184-08 | 2.263157895 |

|                              |             |
|------------------------------|-------------|
| TCGA-38-7271-01A-11D-2036-08 | 0.605263158 |
| TCGA-17-Z043-01A-01W-0746-08 | 4.763157895 |
| TCGA-50-5930-01A-11D-1753-08 | 25.5        |
| TCGA-55-8092-01A-11D-2238-08 | 12.31578947 |
| TCGA-97-A4M7-01A-11D-A24P-08 | 6.263157895 |
| TCGA-62-A46Y-01A-11D-A24D-08 | 0.894736842 |
| TCGA-55-8614-01A-11D-2393-08 | 4.868421053 |
| TCGA-17-Z002-01A-01W-0746-08 | 0.105263158 |
| TCGA-J2-A4AD-01A-11D-A24D-08 | 6.157894737 |
| TCGA-MP-A4TH-01A-31D-A25L-08 | 2.605263158 |
| TCGA-78-7158-01A-11D-2036-08 | 5.921052632 |
| TCGA-91-6829-01A-21D-1855-08 | 14.94736842 |
| TCGA-55-8299-01A-11D-2284-08 | 0.315789474 |
| TCGA-MP-A4TC-01A-11D-A24P-08 | 5.921052632 |
| TCGA-78-7148-01A-11D-2036-08 | 5.026315789 |
| TCGA-17-Z056-01A-01W-0747-08 | 6.973684211 |
| TCGA-44-6777-01A-11D-1855-08 | 7.026315789 |
| TCGA-55-6712-01A-11D-1855-08 | 2.078947368 |
| TCGA-49-4512-01A-21D-1855-08 | 0.763157895 |
| TCGA-MP-A4TE-01A-22D-A25L-08 | 3.421052632 |
| TCGA-55-7911-01A-11D-2167-08 | 4.789473684 |
| TCGA-50-5051-01A-21D-1855-08 | 2.236842105 |
| TCGA-55-7570-01A-11D-2036-08 | 9.421052632 |
| TCGA-86-8673-01A-11D-2393-08 | 10.63157895 |
| TCGA-62-8402-01A-11D-2323-08 | 1.157894737 |
| TCGA-55-6980-01A-11D-1945-08 | 0.236842105 |
| TCGA-75-5122-01A-01D-1753-08 | 1.789473684 |
| TCGA-17-Z011-01A-01W-0746-08 | 2.657894737 |
| TCGA-49-4490-01A-21D-1855-08 | 0.526315789 |
| TCGA-44-7667-01A-31D-2063-08 | 10.31578947 |
| TCGA-86-7953-01A-11D-2184-08 | 1.105263158 |
| TCGA-05-4250-01A-01D-1105-08 | 8.684210526 |
| TCGA-17-Z020-01A-01W-0746-08 | 1.657894737 |
| TCGA-97-A4M0-01A-11D-A24P-08 | 9.342105263 |
| TCGA-75-5146-01A-01D-1625-08 | 4.421052632 |
| TCGA-MN-A4N1-01A-11D-A24P-08 | 10.36842105 |
| TCGA-71-8520-01A-11D-2393-08 | 2.026315789 |
| TCGA-86-8280-01A-11D-2284-08 | 0.842105263 |
| TCGA-55-A4DF-01A-11D-A24D-08 | 16.55263158 |
| TCGA-55-6983-01A-11D-1945-08 | 1.894736842 |
| TCGA-38-4625-01A-01D-1553-08 | 13.76315789 |
| TCGA-64-1677-01A-01W-0928-08 | 4.105263158 |
| TCGA-91-6848-01A-11D-1945-08 | 13.44736842 |

|                              |             |
|------------------------------|-------------|
| TCGA-44-2655-01A-01D-1553-08 | 2.763157895 |
| TCGA-44-7670-01A-11D-2063-08 | 27.10526316 |
| TCGA-17-Z010-01A-01W-0746-08 | 6.263157895 |
| TCGA-50-8459-01A-11D-2323-08 | 1.789473684 |
| TCGA-44-2659-01A-01D-0969-08 | 10.10526316 |
| TCGA-49-4501-01A-01D-1265-08 | 0.973684211 |
| TCGA-44-7659-01A-11D-2063-08 | 3.605263158 |
| TCGA-78-7537-01A-11D-2063-08 | 3.710526316 |
| TCGA-05-4430-01A-02D-1265-08 | 4.578947368 |
| TCGA-69-7763-01A-11D-2167-08 | 1.5         |
| TCGA-91-A4BD-01A-11D-A24D-08 | 0.605263158 |
| TCGA-17-Z031-01A-01W-0746-08 | 60.02631579 |
| TCGA-97-7546-01A-11D-2036-08 | 6.684210526 |
| TCGA-17-Z004-01A-01W-0746-08 | 0.421052632 |
| TCGA-93-A4JQ-01A-11D-A24P-08 | 0.973684211 |
| TCGA-97-A4M2-01A-12D-A24P-08 | 0.078947368 |
| TCGA-17-Z032-01A-01W-0746-08 | 2.342105263 |
| TCGA-05-4397-01A-01D-1265-08 | 21.13157895 |
| TCGA-05-4426-01A-01D-1265-08 | 1.236842105 |
| TCGA-MP-A4TK-01A-11D-A24P-08 | 6.842105263 |
| TCGA-64-5779-01A-01D-1625-08 | 8.5         |
| TCGA-67-4679-01B-01D-1753-08 | 7           |
| TCGA-86-8278-01A-11D-2284-08 | 1.447368421 |
| TCGA-80-5611-01A-01D-1625-08 | 4.631578947 |
| TCGA-86-7955-01A-11D-2184-08 | 7.421052632 |
| TCGA-55-7903-01A-11D-2167-08 | 3.315789474 |
| TCGA-78-7160-01A-11D-2036-08 | 0.684210526 |
| TCGA-55-8087-01A-11D-2238-08 | 0.605263158 |
| TCGA-05-4403-01A-01D-1265-08 | 3.394736842 |
| TCGA-44-3918-01A-01D-A271-08 | 18.60526316 |
| TCGA-49-AARO-01A-12D-A410-08 | 12.84210526 |
| TCGA-50-8460-01A-11D-2323-08 | 0.631578947 |
| TCGA-17-Z009-01A-01W-0746-08 | 0.184210526 |
| TCGA-53-7624-01A-11D-2063-08 | 20.55263158 |
| TCGA-91-6847-01A-11D-1945-08 | 1.394736842 |
| TCGA-55-8301-01A-11D-2284-08 | 5.131578947 |
| TCGA-44-6778-01A-11D-1855-08 | 8.657894737 |
| TCGA-17-Z013-01A-01W-0746-08 | 1.473684211 |
| TCGA-MP-A4T2-01A-11D-A24P-08 | 1.368421053 |
| TCGA-86-7713-01A-11D-2063-08 | 4.052631579 |
| TCGA-91-6835-01A-11D-1855-08 | 0.947368421 |
| TCGA-55-6986-01A-11D-1945-08 | 0.394736842 |
| TCGA-49-AARE-01A-11D-A410-08 | 34.15789474 |

|                              |             |
|------------------------------|-------------|
| TCGA-35-3615-01A-01D-1040-01 | 3.078947368 |
| TCGA-86-A4JF-01A-11D-A24P-08 | 27.68421053 |
| TCGA-05-5425-01A-02D-1625-08 | 11.42105263 |
| TCGA-17-Z060-01A-01W-0747-08 | 6.894736842 |
| TCGA-J2-8194-01A-11D-2238-08 | 3.710526316 |

---

**Abbreviations:** TMB, tumor mutation burden; LUAD, lung adenocarcinoma.
